1 **Title:** Evolution of behavioral resistance in host-pathogen systems

2

3 **Authors:** Caroline R. Amoroso, Janis Antonovics

4 Department of Biology, University of Virginia, Charlottesville, VA, 22902 USA

5

6 **Correspondence**

7 CRA: [cra2z@virginia.edu](mailto:cra2z@virginia.edu)

8 JA: [ja8n@virginia.edu](mailto:ja8n@virginia.edu)

9

10 **Keywords:** avoidance behavior, COVID-19, disgust, epidemics, genetic polymorphism, social  
11 distancing

12

13 **Abstract**

14 Behavioral resistance to parasites is widespread in animals, yet little is known about the  
15 evolutionary dynamics that have shaped these strategies. Theory developed for the evolution of  
16 physiological parasite resistance can only be applied to behavioral resistance under limited  
17 circumstances. We find that accounting explicitly for the behavioral processes, including the  
18 detectability of infected individuals, leads to novel dynamics that are strongly dependent on the  
19 nature of the costs and benefits of social interactions. As with physiological resistance, the  
20 evolutionary dynamics can also lead to mixed strategies that balance the costs of disease risk and  
21 the benefits of social interaction, with implications for understanding avoidance strategies in  
22 human disease outbreaks.

23

## 24 **Introduction**

25 Hosts resist parasites using diverse strategies, with broad implications for host-parasite  
26 coevolution [1–4]. Previous theoretical models of resistance evolution have largely focused on  
27 physiological or biochemical resistance [1,5–7]. Yet resistance against parasites can also take the  
28 form of behavioral traits [3,8,9] such as direct avoidance or “disgust” in response to diseased  
29 individuals [10,11] or general avoidance of interactions with other individuals, which in a human  
30 context is now termed “social distancing.” Here, we ask whether the ecological and evolutionary  
31 dynamics of behavioral defenses against parasites operate according to similar principles as  
32 physiological defenses.

33 Host behavior is implicit in classical models of microparasite transmission as a  
34 component of the parameter  $\beta$  [12,13].  $\beta$  is a composite of multiple factors [14], including, for  
35 directly transmitted parasites, the contact rate between hosts, which is a function of host  
36 behavior, and the per contact transmission probability, which is a function of host physiology  
37 [15]. Models of resistance evolution typically vary the per contact transmission probability, i.e.  
38 the physiological resistance [5,16]. Nevertheless, a high degree of variation in behavioral  
39 resistance to parasites has been reported across and within species: for example, avoidance of  
40 infected conspecifics in crustaceans [17], birds [18,19], and primates [20], including humans  
41 [10]. Despite the broad diversity of these behaviors [8,21,22], behavioral resistance has rarely  
42 been examined explicitly in theoretical contexts [23,24]. It remains unknown whether  
43 evolutionary dynamics of behavioral resistance follow the same patterns as physiological  
44 resistance. Previous theoretical research on physiological resistance has shown that susceptible  
45 and resistant individuals can coexist in the presence of a disease when resistance carries a direct

46 physiological cost [5,7,25], but such models have also not considered how behavioral costs  
47 might influence resistance evolution.

48 Here, we develop a theoretical model of a disease that is transmitted in a social context,  
49 through direct contact or aerosol, and investigate the evolution of behavioral resistance under  
50 several assumptions about behavioral processes and cost-benefit trade-offs. We show that  
51 behavioral resistance can result in evolutionary dynamics that are different from physiological  
52 resistance, depending on the specificity of behavioral responses to diseased conspecifics and the  
53 nature of the costs and benefits of sociality.

54

## 55 **The Model**

### 56 *Social Behavior*

57 We model the social behavior of the host in a population of individuals that enter into groups or  
58 remain singletons. Let  $S$  be the number of singletons and  $G$  the number of groups of size  $T$ , and  
59 total population size,  $N = S + TG$ .

60 The frequency of groups depends on the group encounter rate,  $\rho$ , and group dissociation  
61 rate,  $\nu$ . We use the simplest case of pair formation ( $T = 2$ ) to illustrate the dynamics. Pair  
62 formation in populations has been studied in the context of mating and marriage, and represents a  
63 complex problem of sampling without replacement [26,27]. Following previous work [28], we  
64 consider two forms of encounter. First, singletons can encounter one another at a constant  
65 frequency that is independent of their density, as would occur when individuals seek others out  
66 to form associations. Second, singletons can encounter others randomly, such that encounters  
67 occur at a higher rate at greater densities. These two types of group formation have parallels with

68 frequency-dependent and density-dependent disease transmission processes [28,29]. Throughout,  
69 the derivations of the equations are given in the Supplementary Materials (S1).

### 70 *Equilibrium Group Formation*

71 The number of groups at equilibrium under frequency-dependent encounter is

$$G = \left( \frac{\frac{\rho}{v}}{1 + \frac{\rho}{v}} \right) \left( \frac{N}{T} \right) \quad (1)$$

72 In the case of density dependent encounter, we assume the rate of group formation is a  
73 linear function of the number of singletons,  $\pi S$ , rather than the total population density. Then, the  
74 number of groups at equilibrium is

$$G = N - \frac{(-v + \sqrt{v^2 + 4T\rho vN})}{2T^2\rho} \quad (2)$$

75

### 76 *Behavioral Resistance*

77 We compare two types of behavioral resistance: specific avoidance of diseased individuals and  
78 general avoidance of all associations. For specific avoidance, a healthy, avoiding individual can  
79 detect an infected individual, and avoid pairing with it, determined by a factor  $\phi$ . For general  
80 avoidance, a healthy, avoiding individual encounters all other individuals, regardless of their  
81 infection status, at a reduced rate  $(\rho - a)$ , relative to the background rate of non-avoiding  
82 individuals  $\rho$ . We derive how  $R_0$  depends on the equilibrium frequency of pairs.

83

### 84 *Evolution of Behavioral Resistance*

85 To understand the evolution of behavioral resistance we use the one-locus, two allele dynamical  
86 framework developed for physiological resistance evolution [5]. In this system,  $X_1$  and  $X_2$

87 represent two haploid genotypes that differ in their behavioral resistance to the disease, with  $X_2$   
88 being the avoider.  $X_1$  and  $X_2$  are equivalent in their transmission once infected, such that they  
89 can be pooled into one class of diseased individuals,  $Y$ . Transmission occurs at rate  $\delta$  from  
90 infected ( $Y$ ) individuals to  $X_1$  or  $X_2$  when they are in a pair. Individuals can enter into a pair with  
91 their own type and the other types, the number of pairs of each type calculated from binomial  
92 proportions. We use  $b$  and  $(b - c)$  to refer to birth rate for  $X_1$  and  $X_2$  respectively, where  $c$  is the  
93 cost of resistance (see below), and  $\mu$  the background mortality rate. We assume the disease is  
94 sterilizing, such that diseased individuals do not contribute to reproduction. We also impose  
95 density dependence on birth rate of the healthy individuals because without a numerical or  
96 ecological feedback, the system does not reach stable equilibrium [25]. These processes are  
97 represented by

$$\frac{dX_1}{dt} = X_1(b - kN - \mu) - \delta \left( \frac{2GX_1Y}{N^2} \right) \quad (3)$$

$$\frac{dX_2}{dt} = X_2((b - c) - kN - \mu) - \delta \left( \frac{2GX_2Y}{N^2} \right) \quad (4)$$

$$\frac{dY}{dt} = \delta \left( \frac{2GY}{N^2} \right) (X_1 + X_2) - \mu Y \quad (5)$$

98 We simulated each model to equilibrium using an ordinary differential equation solver  
99 (function “ode” Runge-Kutta “rk4” method) from the R package *deSolve* [29,30]. We explored a  
100 range of values for each parameter (see results), and confirmed equilibria by perturbation.

101

## 102 *Resistance Costs*

103 Physiological resistance is usually assumed to carry some cost that results in reduced fitness in  
104 the absence of the parasite [5,25]. Similarly, we assume  $X_2$  individuals pay some reproductive  
105 cost for avoiding others. First, avoidance may be costly regardless of whether it is instantiated;

106 for example, a less active genotype could have fewer encounters with others, but also have  
107 reduced food acquisition. Thus, the birth rate of  $X_2$  is  $(b - c)$ .

108 Alternatively, costs of avoidance may only be instantiated when the individual avoids  
109 being in a group. This reflects a situation where sociality is beneficial. Thus, we examine the  
110 case in which the reproduction of both  $X_1$  and  $X_2$  increases as a function of the frequency at  
111 which it pairs. We model this benefit as a direct, linear function of the frequency of pairs within  
112 each genotype, such that birth rate for  $X_1$  is calculated as  $(1 + \frac{TGX_1}{X_1})b_1$  and for  $X_2$  as  
113  $(1 + \frac{TGX_2}{X_2})b_2$ .

114

## 115 **Results**

### 116 *Overall Dynamics*

117 In basic models of physiological resistance, the transmission coefficient is a compound of per  
118 contact transmission rate and number of contacts. It can be shown that if all individuals are in  
119 pairs, i.e. in contact, then the dynamics of disease with pair formation are identical to the  
120 physiological resistance model.

121 If pair formation is incomplete, the basic reproductive number of the parasite,  $R_0 = \frac{2\delta G}{N\mu}$ ,  
122 and equivalent to canonical formulations for  $R_0$ . We first examined the effect of the different  
123 pairing behaviors and avoidance strategies on the equilibrium frequency of individuals in pairs,  
124 prevalence of disease, and  $R_0$  when only  $X_2$ , the avoiding genotype, was present (Fig. 1).

125

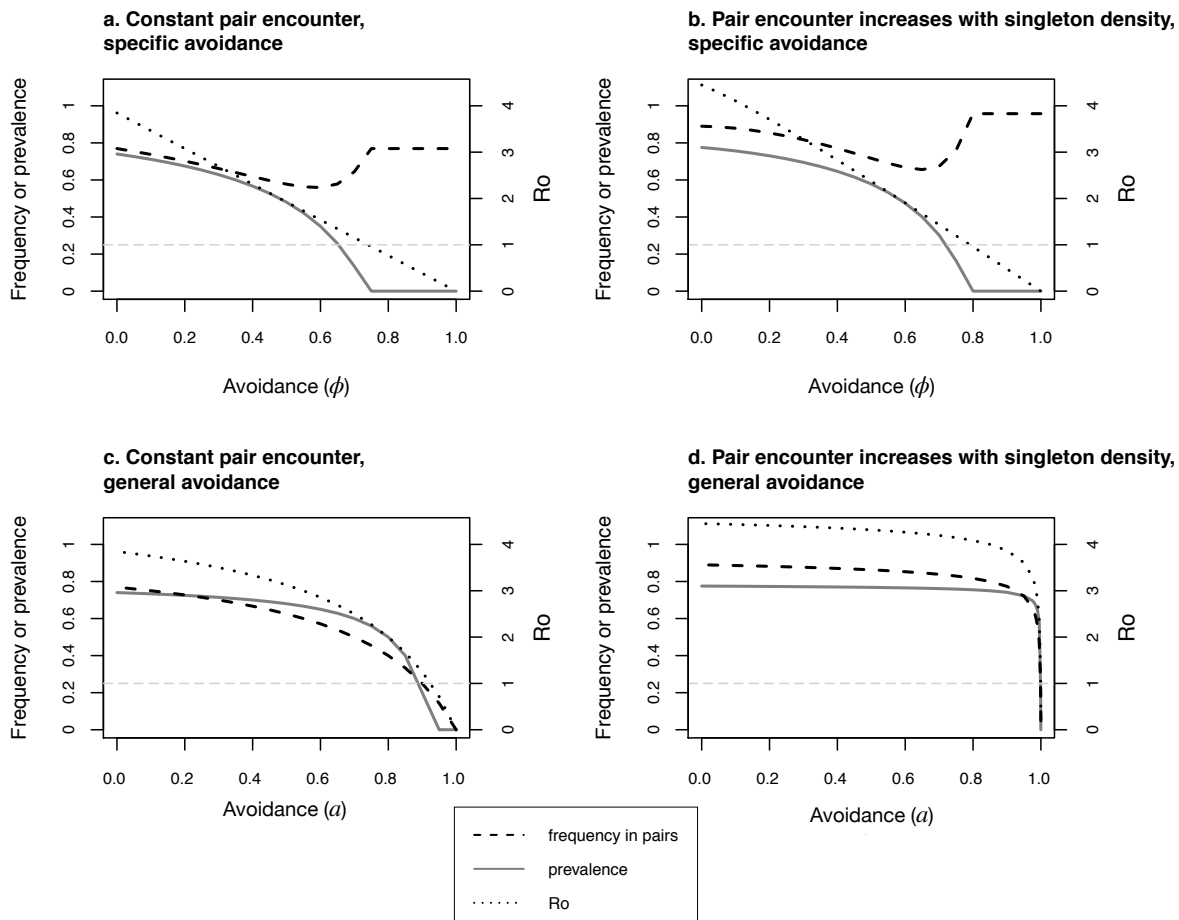

126

127 **Figure 1.** Pairing and disease dynamics at equilibrium when only the avoiding genotype ( $X_2$ ) is present in the  
 128 population, under different pairing processes and avoidance strategies. The light gray horizontal dotted line  
 129 represents when the basic reproductive number,  $R_0 = 1$ , below which the disease cannot persist in the population,  
 130 and above which sustained transmission is possible.  $b = 1, \mu = 0.2, \delta = 1, v = 0.3, k = 0.01$ .

131

132 Under both pair formation processes, increased specific avoidance of infected individuals

133 (Figs. 1a and 1b) is highly effective at reducing prevalence of the disease, and as  $X_2$  avoids  $Y$  it

134 also results in a decrease in the frequency of individuals in pairs. However, the frequency of

135 individuals in pairs increases again at high specific avoidance, because few infected individuals

136 remain for the healthy  $X_2$  individuals to encounter. With further avoidance,  $R_0$  falls below 1,

137 prevalence drops to 0, and pair formation is only among healthy individuals. Thus, at high levels  
138 of specific avoidance, hosts can successfully extirpate the disease from the population while  
139 maintaining their social structure.

140 Contrarily, while general avoidance reduces  $R_0$  and prevalence, as long as per contact  
141 transmission rate is high, avoidance of pairing must be nearly complete (Figs. 1c and 1d) to  
142 reduce  $R_0$  below the threshold of 1. In other words, if hosts are not able to detect infection in  
143 conspecifics, behavioral avoidance effectively reduces disease risk, but possibly at levels where  
144 the hosts compromise their social structure.

145

#### 146 *Resistance Evolution*

147 We next examined the evolutionary dynamics in a population with genetic variants that do ( $X_2$ )  
148 and do not ( $X_1$ ) avoid disease when resistance carried a fixed cost. When behavioral resistance  
149 was through specific avoidance of infected individuals ( $\phi$ ),  $X_1$  and  $X_2$  could stably coexist across  
150 a range of avoidance levels, even at very high costs (>50% reduction in birth rate) when  
151 avoidance of infected individuals was highest (Fig. 2a). Varying behavioral resistance through  
152 general avoidance, ( $\rho - a$ ), resulted in the same overall pattern, with polymorphism occurring  
153 across the broadest range of costs when avoidance was greatest (Fig. 2b). However, consistent  
154 with the results in Fig. 1, even high levels of general avoidance still resulted in some frequency  
155 of pairing with infected individuals. Thus, under the general avoidance strategy,  $X_2$  could not  
156 tolerate as great a reduction in birth rate at intermediate levels of avoidance.

157



158

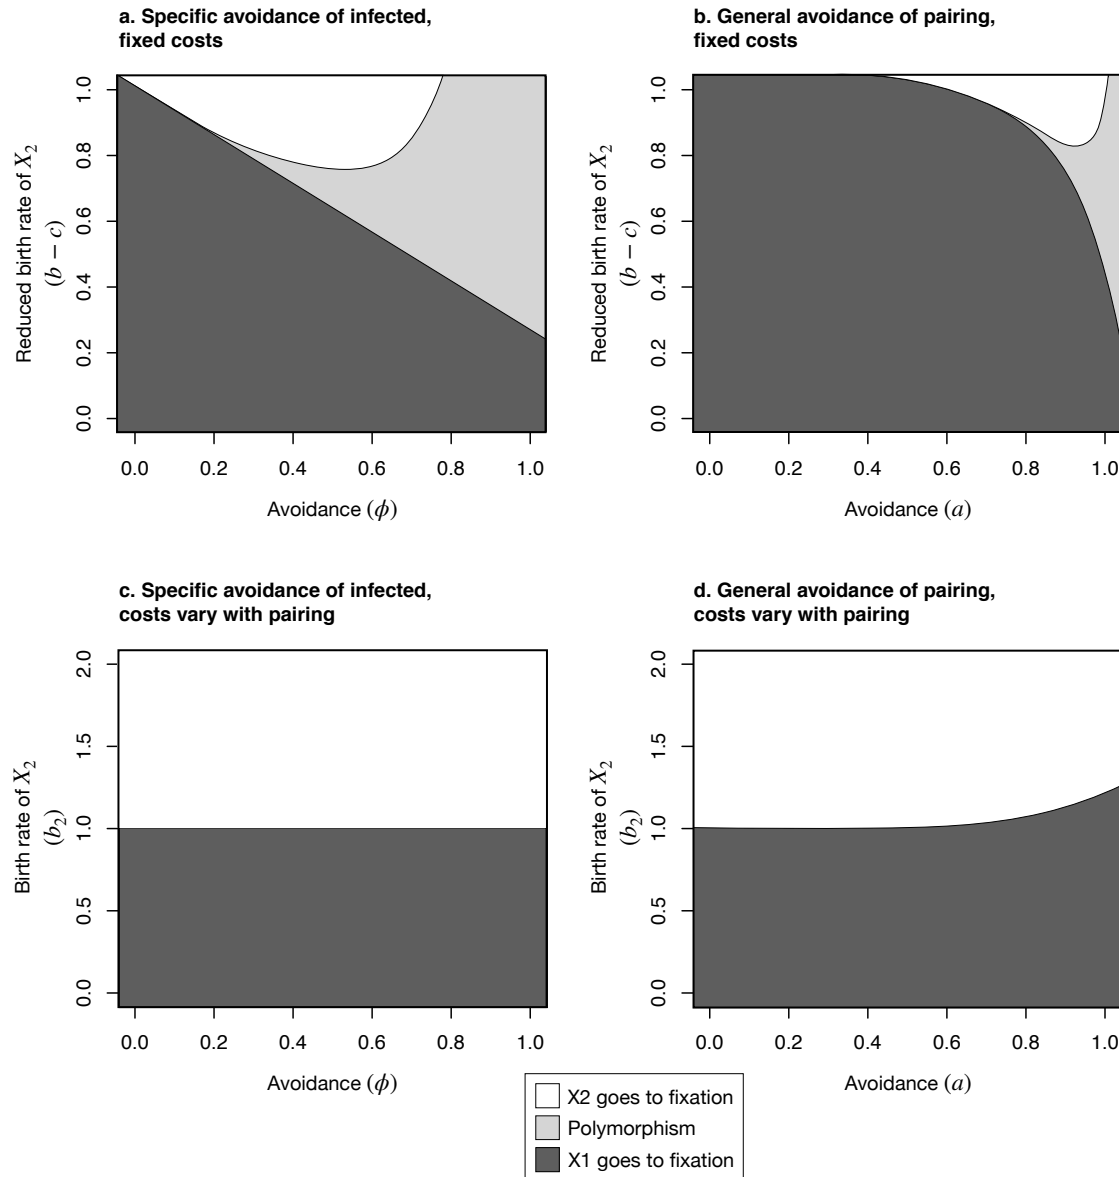

159 **Figure 2:** Shaded areas represent equilibrium gene frequency states for the models when the cost of  $X_2$  and the  
 160 avoidance strategy of  $X_2$  are varied. Possible outcomes include  $X_1$  or  $X_2$  becoming fixed in the population, or  $X_1$  and  
 161  $X_2$  coexisting, i.e. polymorphism. All plots show results for constant rate of pair encounter. (Corresponding plots for  
 162 density-dependent pair encounter rates can be found in Supplementary Materials S2).  $b = 1, \mu = 0.2, \delta = 1, v =$   
 163  $0.3, k = 0.01$ .  
 164

165 We next assumed that individuals receive a benefit as a function of social behavior

166 relative to being alone, we found that in the case of specific avoidance the benefits of reduced

167 disease risk evenly balanced the costs of lost social interactions, such that  $X_2$  only went to  
168 fixation when its fitness was relatively greater than  $X_1$  (Fig. 2c). When avoidance was general,  
169  $X_1$  could even sometimes reach fixation when  $X_2$  had a higher birth rate, because at high rates of  
170 general avoidance, reductions in disease risk are not substantial enough to compensate for the  
171 loss of social contacts (Fig. 2d). In both cases, when costs were linearly dependent on the  
172 frequency of individuals in pairs, polymorphism between  $X_1$  and  $X_2$  was not possible.

173 While we only present the results from models with a constant rate of pair encounter, the  
174 patterns of polymorphism were qualitatively similar when pair encounter rate depended on the  
175 density of singletons (Supplementary Materials S2).

176

## 177 **Discussion**

178 We present evidence here that the evolution of behavioral resistance can differ from  
179 physiological or biochemical resistance evolution depending on the costs and benefits of  
180 resistance and sociality. Similar to physiological resistance, polymorphism in behavioral  
181 resistance can be maintained across a broad range of fixed costs when the level of resistance is  
182 high [5,25]. When enough behaviorally resistant individuals are present in the population,  
183 behavioral avoidance strategies can effectively reduce the disease risk so that susceptible  
184 individuals can coexist.

185 However, such polymorphism is much less likely to occur when social interactions have  
186 benefits, as they do in many social organisms. In the case of specific avoidance, when infected  
187 individuals are detectable, social interactions are limited only in situations where avoidance will  
188 provide the benefit of reduced transmission. Thus specific avoidance reduces the negative  
189 impacts of lost social opportunities, and even allows for the full recuperation of social behavior

190 when avoidance is high enough to fully extirpate the disease through behavioral mechanisms.  
191 Yet when avoidance is general and at a high level, the costs of lost social interactions are higher  
192 than the benefits of reduced disease risk because of ‘mistakes’ in selection of diseased or healthy  
193 social partners. This comparison highlights the challenge of controlling an outbreak of an  
194 emergent disease, especially when asymptomatic transmission is possible, as in COVID-19 [31].  
195 The maintenance of a polymorphic state under some conditions suggests that if avoidance  
196 behavior could be performed flexibly, a mixed strategy of social distancing that allows for some  
197 social interaction could strike a balance between the costs and benefits.

198         To dissect the basic differences between behavioral and physiological resistance we have  
199 deliberately kept the models simple. Application to any specific host-pathogen context would  
200 require more complexity in the temporal and social structure of the interactions. For example, in  
201 nature individuals interact more fluidly, increasing opportunities for transmission. As groups  
202 become larger, transmission within groups and movement between groups would be possible,  
203 and behavioral resistance strategies could become more diverse. Consistent with previous  
204 research, this simple model highlights trade-offs between the benefits of reducing disease risk  
205 and the costs of foregoing other opportunities, whether nutritional [23], reproductive [24], or in  
206 the case of our model, social.

207         Behavioral and physiological resistance are not separate phenomena but are likely to  
208 interact, with behavioral effects being antecedent to physiological resistance, in a framework  
209 similar to a two-step infection process [32]. In such situations, genetic associations can arise  
210 between genes determining resistance, even though they may have no direct physiological  
211 interaction. Physiological and behavioral defenses against parasites might therefore trade-off

212 with one another either directly or indirectly. For example, house finches that avoid sick  
213 conspecifics invest less in immune defenses [19].

214 A genetic basis for parasite avoidance behaviors has support from knockout experiments  
215 in laboratory mice [33] and selective breeding in livestock [34]. Direct evidence of genetic  
216 polymorphism in social behavior in natural populations has also begun to emerge [35].  
217 Behavioral resistance can thus be innate, as we model it, or it can be learned through prior  
218 exposure [36–38], and how dynamics of learned resistance would differ from innate is a rich  
219 direction for future research. Together these innate and learned responses represent a suite of  
220 psychological and cognitive mechanisms that psychologists have termed the “behavioral immune  
221 system” [39]. Innate and acquired behavioral resistance are conceptually parallel to innate and  
222 adaptive immune responses, but whether this metaphor translates to equivalent dynamics merits  
223 further examination.

224

## 225 **Funding**

226 This work was funded by NIH R01GM122061, part of the joint NSF-NIH-USDA Ecology and  
227 Evolution of Infectious Diseases program.

228

## 229 **Code and Supporting Materials**

230 All code and derivations can be found in the Supplementary Materials.

231

## 232 **Competing Interests**

233 The authors have no competing interests to declare.

234

## 235 Authors' Contributions

236 CRA and JA conceived the project and derived the equations together. CRA carried out the  
237 simulations and drafted the manuscript. JA provided critical input on the simulations and  
238 revisions to the manuscript. All authors gave final approval for publication and agree to be held  
239 accountable for the work performed therein.

## 240 241 References

- 242
- 243 1. Boots M, Bowers RG. 1999 Three mechanisms of host resistance to microparasites -  
244 avoidance, recovery and tolerance - show different evolutionary dynamics. *J. Theor. Biol.*  
245 **201**, 13–23. (doi:10.1006/jtbi.1999.1009)
- 246 2. Hayward AD, Garnier R, Watt KA, Pilkington JG, Grenfell BT, Matthews JB, Pemberton  
247 JM, Nussey DH, Graham AL. 2014 Heritable, heterogeneous, and costly resistance of  
248 sheep against nematodes and potential feedbacks to epidemiological dynamics. *Am. Nat.*  
249 **184**. (doi:10.1086/676929)
- 250 3. Parker BJ, Barribeau SM, Laughton AM, Roode JC De, Gerardo NM. 2011 Non-  
251 immunological defense in an evolutionary framework. *Trends Ecol. Evol.* **26**, 242–248.  
252 (doi:10.1016/j.tree.2011.02.005)
- 253 4. Best A, White A, Boots M. 2009 The implications of coevolutionary dynamics to host-  
254 parasite interactions. *Am. Nat.* **173**, 779–791. (doi:10.1086/598494)
- 255 5. Antonovics J, Thrall PH. 1994 The cost of resistance and the maintenance of genetic  
256 polymorphism in host-pathogen systems. *Proc. R. Soc. B Biol. Sci.* **257**, 105–110.
- 257 6. Antonovics J, Boots M, Ebert D, Koskella B, Poss M, Sadd BM. 2013 The origin of  
258 specificity by means of natural selection: Evolved and nonhost resistance in host-pathogen  
259 interactions. *Evolution (N. Y.)*. **67**, 1–9. (doi:10.1111/j.1558-5646.2012.01793.x)
- 260 7. Boots M, Bowers RG. 2004 The evolution of resistance through costly acquired  
261 immunity. *Proc. R. Soc. B Biol. Sci.* **271**, 715–723. (doi:10.1098/rspb.2003.2655)
- 262 8. Hart BL. 2011 Behavioural defences in animals against pathogens and parasites: parallels  
263 with the pillars of medicine in humans. *Philos. Trans. R. Soc. B Biol. Sci.* **366**, 3406–3417.  
264 (doi:10.1098/rstb.2011.0092)
- 265 9. Roode JC De, Lefèvre T. 2012 Behavioral immunity in insects. *Insects* **3**, 789–820.  
266 (doi:10.3390/insects3030789)
- 267 10. Curtis V, de Barra M, Aunger R. 2011 Disgust as an adaptive system for disease  
268 avoidance behaviour. *Philos. Trans. R. Soc. Lond. B. Biol. Sci.* **366**, 389–401.  
269 (doi:10.1098/rstb.2010.0117)
- 270 11. Tybur JM, Lieberman D. 2016 Human pathogen avoidance adaptations. *Curr. Opin.*  
271 *Psychol.* **7**, 6–11. (doi:10.1016/j.copsyc.2015.06.005)
- 272 12. Anderson RM, May RM. 1979 Population biology of infectious diseases: Part I. *Nature*  
273 **280**, 361–367. (doi:10.1038/280361a0)
- 274 13. May RM, Anderson RM. 1979 Population biology of infectious diseases: Part II. *Nature*  
275 **280**, 455–461. (doi:10.1038/280455a0)

- 276 14. Antonovics J, Iwasa Y, Hassell MP. 1995 A generalized model of parasitoid, venereal,  
277 and vector-based transmission processes. *Am. Nat.* **145**, 661–675.
- 278 15. McCallum H *et al.* 2017 Breaking beta: Deconstructing the parasite transmission function.  
279 *Philos. Trans. R. Soc. B Biol. Sci.* **372**. (doi:10.1098/rstb.2016.0084)
- 280 16. Boots M, Haraguchi Y. 1999 The evolution of costly resistance in host-parasite systems.  
281 *Am. Nat.* **153**, 359–370. (doi:10.1086/303181)
- 282 17. Behringer DC, Butler MJ, Shields JD. 2006 Avoidance of disease by social lobsters.  
283 *Nature* **441**, 421. (doi:10.1038/441421)
- 284 18. Bouwman KM, Hawley DM. 2010 Sickness behaviour acting as an evolutionary trap?  
285 Male house finches preferentially feed near diseased conspecifics. *Biol. Lett.* **6**, 462–465.  
286 (doi:10.1098/rsbl.2010.0020)
- 287 19. Zylberberg M, Klasing KC, Hahn TP. 2013 House finches (*Carpodacus mexicanus*)  
288 balance investment in behavioural and immunological defences against pathogens. *Biol.*  
289 *Lett.* **9**. (doi:10.1098/rsbl.2012.0856)
- 290 20. Poirotte C, Massol F, Herbert A, Willaume E, Bomo PM, Kappeler PM, Charpentier MJE.  
291 2017 Mandrills use olfaction to socially avoid parasitized conspecifics. *Sci. Adv.* **3**,  
292 e1601721. (doi:10.1126/sciadv.1601721)
- 293 21. Curtis VA 2014 Infection-avoidance behaviour in humans and other animals. *Trends*  
294 *Immunol.* **35**, 457–64. (doi:10.1016/j.it.2014.08.006)
- 295 22. Buck JC, Weinstein SB, Young HS. 2018 Ecological and evolutionary consequences of  
296 parasite avoidance. *Trends Ecol. Evol.* **0**, 1–14. (doi:10.1016/j.tree.2018.05.001)
- 297 23. Fox NJ, Marion G, Davidson RS, White PCL, Hutchings MR. 2013 Modelling parasite  
298 transmission in a grazing system: The importance of host behaviour and immunity. *PLoS*  
299 *One* **8**. (doi:10.1371/journal.pone.0077996)
- 300 24. Theuer M, Berec L. 2018 Impacts of infection avoidance for populations affected by  
301 sexually transmitted infections. *J. Theor. Biol.* **455**, 64–74.  
302 (doi:10.1016/j.jtbi.2018.06.030)
- 303 25. Boots M, Best A, Miller MR, White A. 2009 The role of ecological feedbacks in the  
304 evolution of host defence: What does theory tell us? *Philos. Trans. R. Soc. B Biol. Sci.*  
305 **364**, 27–36. (doi:10.1098/rstb.2008.0160)
- 306 26. Haderer KP. 1989 Pair formation in age-structured populations. *Acta Appl. Math.* **14**, 91–  
307 102. (doi:10.1017/CBO9781107415324.004)
- 308 27. Gimelfarb A. 1988 Processes of pair formation leading to assortative mating in biological  
309 populations: encounter-mating model. *Am. Nat.* **131**, 865–884.
- 310 28. Antonovics J, Bergmann J, Hempel S, Verbruggen E, Veresoglou S, Rillig M. 2015 The  
311 evolution of mutualism from reciprocal parasitism: more ecological clothes for the  
312 Prisoner’s Dilemma. *Evol. Ecol.* **29**, 627–641. (doi:10.1007/s10682-015-9775-6)
- 313 29. Soetaert K, Petzoldt T, Setzer RW. 2010 Solving differential equations in R: Package  
314 deSolve. *J. Stat. Softw.* **33**, 1–25. (doi:10.18637/jss.v033.i09)
- 315 30. R Development Core Team R. 2011 R: A language and environment for statistical  
316 computing. *R Found. Stat. Comput.* **1**, 409. (doi:10.1007/978-3-540-74686-7)
- 317 31. Bai Y, Yao L, Wei T, Tian F, Jin D-Y, Chen L, Wang M. 2020 Presumed asymptomatic  
318 carrier transmission of COVID-19. *N. Engl. J. Med.* **323**, 1406–1407.  
319 (doi:10.1056/NEJMoa2001316)
- 320 32. Fenton A, Antonovics J, Brockhurst MA. 2012 Two-step infection processes can lead to  
321 coevolution between functionally independent infection and resistance pathways.

- 322 *Evolution*. **66**, 2030–2041. (doi:10.1111/j.1558-5646.2012.01578.x)
- 323 33. Kavaliers M, Choleris E, Ågmo A, Muglia LJ, Ogawa S, Pfaff DW. 2005 Involvement of  
324 the oxytocin gene in the recognition and avoidance of parasitized males by female mice.  
325 *Anim. Behav.* **70**, 693–702. (doi:10.1016/j.anbehav.2004.12.016)
- 326 34. Hutchings MR, Knowler KJ, McAnulty R, McEwan JC. 2007 Genetically resistant sheep  
327 avoid parasites to a greater extent than do susceptible sheep. *Proc. R. Soc. B Biol. Sci.*  
328 **274**, 1839–1844. (doi:10.1098/rspb.2007.0398)
- 329 35. Kocher SD, Mallarino R, Rubin BER, Yu DW, Hoekstra HE, Pierce NE. 2018 The genetic  
330 basis of a social polymorphism in halictid bees. *Nat. Commun.* **9**. (doi:10.1038/s41467-  
331 018-06824-8)
- 332 36. Klemme I, Karvonen A. 2016 Learned parasite avoidance is driven by host personality  
333 and resistance to infection in a fish-trematode interaction. *Proc. R. Soc. B Biol. Sci.* **283**.  
334 (doi:10.1098/rspb.2016.1148)
- 335 37. James CT, Noyes KJ, Stumbo AD, Wisenden BD, Goater CP. 2008 Cost of exposure to  
336 trematode cercariae and learned recognition and avoidance of parasitism risk by fathead  
337 minnows *Pimephales promelas*. *J. Fish Biol.* **73**, 2238–2248. (doi:10.1111/j.1095-  
338 8649.2008.02052.x)
- 339 38. Klemme I, Karvonen A. 2018 Experience and dominance in fish pairs jointly shape  
340 parasite avoidance behaviour. *Anim. Behav.* **146**, 165–172.  
341 (doi:10.1016/j.anbehav.2018.10.022)
- 342 39. Schaller M, Park JH. 2011 The behavioral immune system (and why it matters). *Curr.*  
343 *Dir. Psychol. Sci.* **20**, 99–103. (doi:10.1177/0963721411402596)
- 344

## Supplementary Materials – S1: Equations

Equations are numbered as Supplementary Equations (SE) for ease of reference relative to the equations in the main text.

### If encounter rate is at a constant frequency

The differential equations for number of groups and singletons are given as:

$$\frac{dG}{dt} = \rho S - \nu G \quad (SE1)$$

$$\frac{dS}{dt} = T(\nu G - \rho S) \quad (SE2)$$

By setting  $\frac{dS}{dt}$  and  $\frac{dG}{dt}$  to zero, we can calculate that at equilibrium, the ratio of groups to singletons,  $\frac{G}{S} = \frac{\rho}{\nu}$ . The frequency of individuals in groups, or  $\frac{TG}{N}$ , can be calculated from this equation as  $\frac{\frac{\rho}{\nu}}{1 + \frac{\rho}{\nu}}$ . Thus, the number of groups at equilibrium is

Number of pairs of X1 (if all the individuals in the population were X1):

$$G_1 = \left( \frac{\frac{\rho}{\nu}}{1 + \frac{\rho}{\nu}} \right) \left( \frac{N}{T} \right) \quad (SE3)$$

Number of pairs of X2 (if all individuals in the population were X2):

$$G_2 = \left( \frac{\frac{\rho - a}{\nu}}{1 + \frac{\rho - a}{\nu}} \right) \left( \frac{N}{T} \right) \quad (SE4)$$

### If encounter rate is dependent on the density of singletons

Such a scenario could be represented by a number of functions, but for the sake of simplicity, we calculate the rate at which groups encounter one another as a function of the number of singletons,  $\rho S$ . Thus, as more singletons exist in the population, group formation increases.

This gives us the following differential equations:

$$\frac{dG}{dt} = \rho S^2 - \nu G \quad (SE5)$$



$$\frac{dS}{dt} = T(vG - \rho S^2) \quad (SE6)$$

At equilibrium,  $\frac{G}{S^2} = \frac{\rho}{v}$ . We can substitute  $G = \frac{N-S}{T}$  into this equation, which can be reduced to  $T\rho S^2 + vS - vN = 0$ . Using the quadratic formula, we can calculate that

$$S = \frac{-\mu + \sqrt{\mu^2 + 4T\rho\mu N}}{2T\rho} \quad (SE7)$$

And the number of pairs at equilibrium can be calculated as follows.

$$G = \frac{N - S}{T} \quad (SE8)$$

Thus, the number of pairs of X1 (if all the individuals in the population were X1) is

$$G_1 = N - \frac{-v + \sqrt{v^2 + 4T(\rho)vN}}{2T^2\rho} \quad (SE9)$$

And the number of pairs of X2 (if all individuals in the population were X2) is

$$G_2 = N - \frac{-v + \sqrt{v^2 + 4T(\rho - a)vN}}{2T^2(\rho - a)} \quad (SE10)$$

Where...

$N$  = total population size

$\rho$  = rate of pair encounter

$v$  = rate of unpairing

$a$  = general avoidance parameter (=0 in case of specific avoidance)

$T$  = group size (=2 henceforth)

### Number of pairs of each type

Number of pairs of X1 and X2 with Y individuals, which provides the opportunity for transmission:

$$P_{X_1Y} = 2G_1 \left(\frac{X_1}{N}\right) \left(\frac{Y}{N}\right) = \left(\frac{2G_1X_1Y}{N^2}\right) \quad (SE11)$$

$$P_{X_2Y} = (1 - \phi) 2G_2 \left(\frac{X_2}{N}\right) \left(\frac{Y}{N}\right) = (1 - \phi) \left(\frac{2G_2X_2Y}{N^2}\right) \quad (SE12)$$

Where  $\phi$  = specific avoidance (=0 in case of general avoidance)

Total number of X1 and X2 in pairs:

$$P_{X1} = \frac{2G_1X_1}{N} \quad (SE13)$$

$$P_{X2} = \frac{2G_2X_2}{N} - (\phi) 2G_2 \left(\frac{X_2}{N}\right) \left(\frac{Y}{N}\right) \quad (SE14)$$

where subtracting  $(\phi) 2G_2 \left(\frac{X_2}{N}\right) \left(\frac{Y}{N}\right)$  represents removing the pairs that were NOT formed as a result of specific avoidance of infected individuals.

### Fixed costs

If costs are fixed, then the following equations define the rate of change of each type of individual:

$$\frac{dX_1}{dt} = X_1(b - kN - \mu) - \delta \left(\frac{2G_1X_1Y}{N^2}\right) \quad (SE15)$$

$$\frac{dX_2}{dt} = X_2((b - c) - kN - \mu) - \delta(1 - \phi) \left(\frac{2G_2X_2Y}{N^2}\right) \quad (SE16)$$

$$\frac{dY}{dt} = \delta \left(\frac{2G_1X_1Y}{N^2}\right) + \delta(1 - \phi) \left(\frac{2G_2X_2Y}{N^2}\right) - \mu Y \quad (SE17)$$

Where...

$b$  = birth rate

$c$  = fixed cost

$\delta$  = transmission given contact

$\mu$  = mortality

### Costs depend on social structure

If costs depend on pairing, then the following equations define the rate of change of each type of individual:

$$\frac{dX_1}{dt} = X_1 \left( b_1 \left( 1 + \frac{P_{X1}}{X_1} \right) - kN - \mu \right) - \delta \left( \frac{2G_1X_1Y}{N^2} \right) \quad (SE18)$$

$$\frac{dX_2}{dt} = X_2 \left( (b_2 \left( 1 + \frac{P_{X2}}{X_2} \right) - kN - \mu) - \delta(1 - \phi) \left( \frac{2G_2X_2Y}{N^2} \right) \right) \quad (SE19)$$

$$\frac{dY}{dt} = \delta \left( \frac{2G_1X_1Y}{N^2} \right) + \delta(1 - \phi) \left( \frac{2G_2X_2Y}{N^2} \right) - \mu Y \quad (SE20)$$

### Transmission term in behavioral vs. physiological resistance

When all individuals are in pairs, the model of behavioral processes of resistance is identical to a mass action model of mixing behavior. To illustrate this, using the  $X_1$  genotype as an example,

the transmission term is classically represented by  $\beta X_1 \left(\frac{Y}{N}\right)$ . In the present behavioral model, when all individuals are in pairs,  $G = \frac{N}{2}$ . Substituting this fraction for G in the transmission term for  $X_1$  above gives

$$2\delta \left(\frac{N}{2}\right) \left(\frac{X_1}{N}\right) \left(\frac{Y}{N}\right) \quad (SE21)$$

which simplifies to the equivalent  $\delta X_1 \left(\frac{Y}{N}\right)$ . The same follows for transmission to  $X_2$ .

### Calculating $R_0$

$R_0$ , or the basic reproductive number, is the condition that must be met for new infections to be produced in any time step of the model. In other words, the differential equation for Y must be greater than 0.

$$0 < \frac{dY}{dt} = \frac{2\delta G Y}{N^2} (X_1 + X_2) - \mu Y \quad (SE22)$$

When Y is rare,  $X_1 + X_2 \approx N$ , which gives

$$0 < \frac{2\delta G}{N} - \mu \quad (SE23)$$

This can be further reduced to the formula for  $R_0$ :

$$1 < \frac{2\delta G}{N\mu} = R_0 \quad (SE24)$$

This formulation represents the frequency of pairs  $\frac{2G}{N}$  multiplied by per contact transmission probability ( $\delta$ ), divided by the background mortality rate ( $\mu$ ).

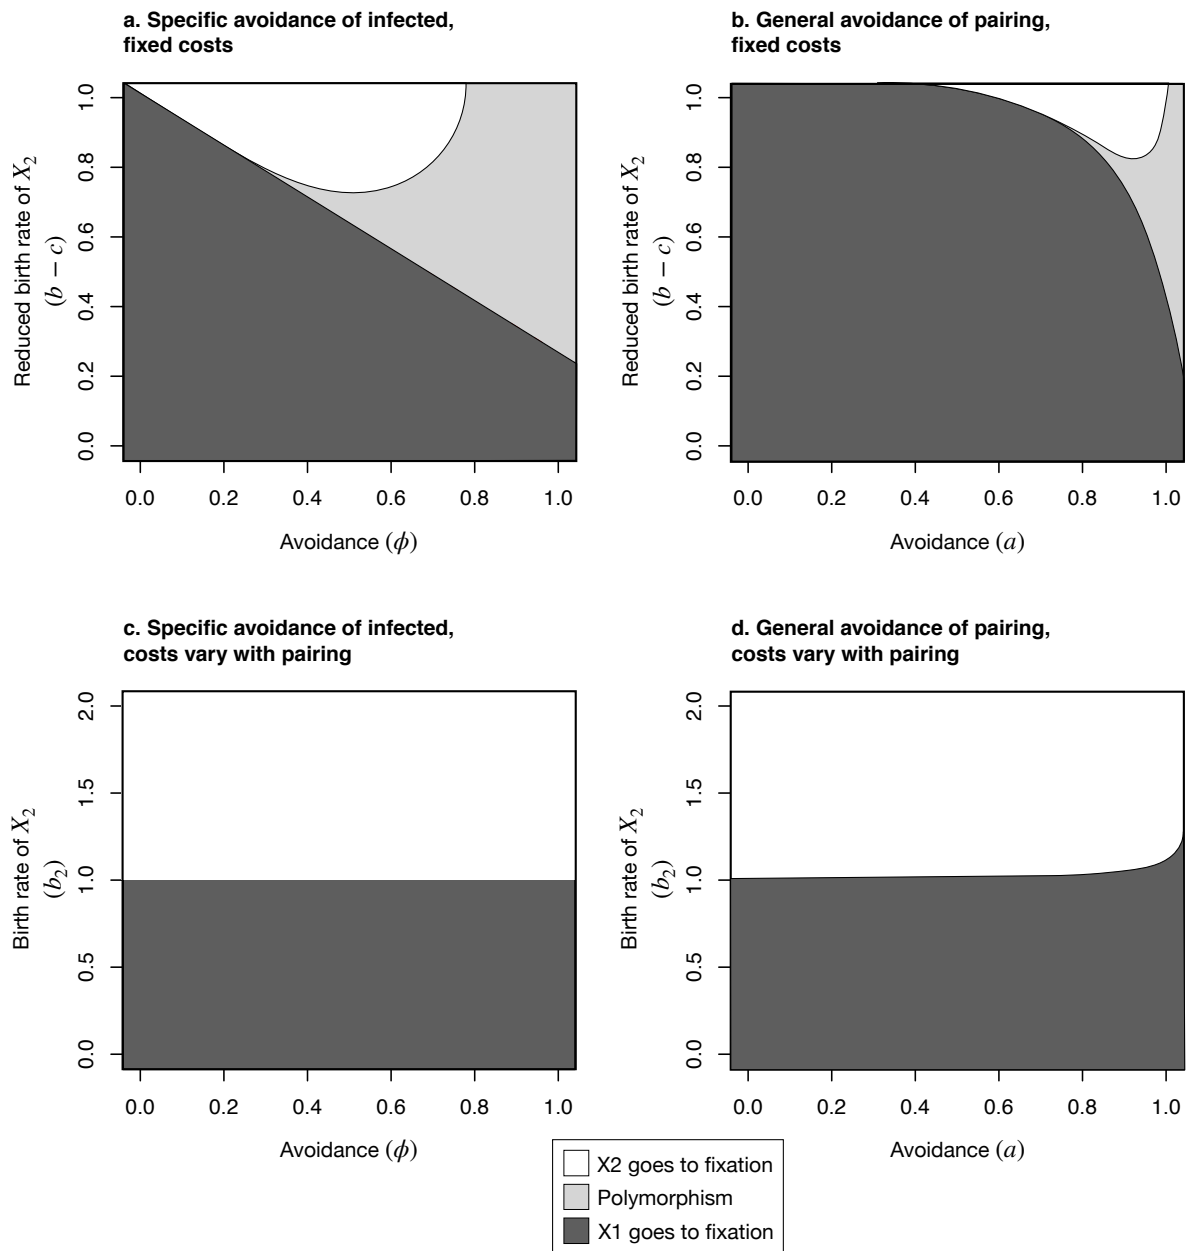

**Figure S1:** Shaded areas represent equilibrium gene frequency states for the models when the cost of  $X_2$  and the avoidance strategy of  $X_2$  are varied. Possible outcomes include  $X_1$  or  $X_2$  becoming fixed in the population, or  $X_1$  and  $X_2$  coexisting, i.e. polymorphism. All plots show results for density dependent encounter rate.  $b = 1, \mu = 0.2, \delta = 1, v = 0.3, k = 0.01$ .
