1 **Title:** Evolution of behavioral resistance in host-pathogen systems

2

3 **Authors:** Caroline R. Amoroso, Janis Antonovics

4 Department of Biology, University of Virginia, Charlottesville, VA, 22902 USA

5

6 **Correspondence**

7 CRA: [cra2z@virginia.edu](mailto:cra2z@virginia.edu)

8 JA: [ja8n@virginia.edu](mailto:ja8n@virginia.edu)

9

10 **Keywords:** avoidance behavior, disgust, epidemics, genetic polymorphism, social distancing

11

12 **Abstract**

13 Behavioral resistance to parasites is widespread in animals, yet little is known about the  
14 evolutionary dynamics that have shaped these strategies. We show that theory developed for the  
15 evolution of physiological parasite resistance can only be applied to behavioral resistance under  
16 limited circumstances. We find that accounting explicitly for the behavioral processes, including  
17 the detectability of infected individuals, leads to novel dynamics that are strongly dependent on  
18 the nature of the costs and benefits of social interactions. As with physiological resistance, the  
19 evolutionary dynamics can also lead to mixed strategies that balance the costs of disease risk and  
20 the benefits of social interaction, with implications for understanding avoidance strategies in  
21 human disease outbreaks.

22

23

## 24 **Introduction**

25 Hosts resist parasites using diverse mechanisms, with broad implications for host-parasite  
26 coevolution [1–4]. Previous theoretical models of resistance evolution have largely focused on  
27 physiological or biochemical resistance [1,5–7]. Yet resistance against parasites can also take the  
28 form of behavioral traits [3,8,9] such as direct avoidance or “disgust” in response to diseased  
29 individuals [10,11] or general avoidance of interactions with other individuals, which in a human  
30 context is now termed “social distancing.” Ecologists have long recognized that social behaviors  
31 can both facilitate and prevent transmission [12–14]. Here, we ask whether the ecological and  
32 evolutionary dynamics of behavioral defenses against parasites operate according to similar  
33 principles as physiological defenses.

34 Host behavior is implicit in classical models of microparasite transmission as a  
35 component of the parameter  $\beta$ , the transmission coefficient [15,16].  $\beta$  is a composite of multiple  
36 factors [17], including the contact rate between hosts, which is a function of host behavior, and  
37 the per contact transmission probability, which is a function of the infected host’s infectiousness  
38 and the susceptible host’s physiology [18]. Models of resistance evolution typically vary the  
39 physiological resistance of the susceptible host [5,19]. Nevertheless, variation in avoidance of  
40 infected conspecifics exists across and within species: e.g., crustaceans [20], birds [21,22], and  
41 primates [23], including humans [10]. Despite the broad diversity of these behaviors [8,24,25],  
42 behavioral resistance has rarely been examined explicitly in theoretical contexts [26,27]. It  
43 remains unknown whether evolutionary dynamics of behavioral resistance follow the same  
44 patterns as physiological resistance. Previous theoretical research on physiological resistance has  
45 shown that susceptible and resistant individuals can coexist in the presence of a disease when  
46 resistance carries a direct physiological cost [5,7,28], but in social species, lost interactions with

47 others as function of avoiding disease could constitute a social cost. Models have not yet  
48 considered how such costs might influence resistance evolution.

49 Here, we develop a theoretical model of a disease transmitted in a social context, through  
50 direct contact or aerosol, and investigate the evolution of behavioral resistance under several  
51 assumptions about behavioral processes and cost-benefit trade-offs. We show with this heuristic  
52 model that behavioral resistance can result in evolutionary dynamics that differ from  
53 physiological resistance, depending on the specificity of behavioral responses to diseased  
54 conspecifics and the nature of the costs and benefits of sociality.

55

## 56 **The Model**

57 We model social behavior in a population of individuals that enter into groups or remain  
58 singletons. Let  $S$  be the number of singletons and  $G$  the number of groups of size  $T$ . Thus, the  
59 total population size in a given time-step is the sum of singletons and individuals in groups,  
60  $N = S + TG$ . (We provide full derivations of subsequent equations in the Supplementary  
61 Information, S1). We assume group formation occurs rapidly, reaching equilibrium within each  
62 time-step, prior to transmission, birth, and death. Once groups are formed, disease transmission  
63 is only possible within groups. We assume a large population and deterministic dynamics.

64

### 65 *Model Structure*

66 *Group Formation:* The frequency of groups depends on the group encounter rate,  $\rho$ , and group  
67 dissociation rate,  $\nu$ . We model the simplest case: pair formation ( $T = 2$ ). Pair formation has been  
68 studied in the context of mating and marriage, and represents a complex problem of sampling  
69 without replacement [29,30]. Following previous work [31], we considered two forms of

70 encounter. First, singletons could encounter one another at a constant frequency, independent of  
71 their density, as would occur when individuals seek others out to form associations. Second,  
72 singletons could encounter others randomly, such that encounters occur at a higher rate at greater  
73 densities. These two types of group formation have parallels with frequency-dependent and  
74 density-dependent disease transmission processes [31]. Given that the two types of encounter  
75 gave qualitatively similar results, in the main text we present only the frequency-dependent case  
76 (density-dependent results are in Supplementary Information, S2). The differential equations for  
77 number of groups and singletons are

$$\frac{dG}{dt} = \rho S - \nu G \quad (1)$$

78

$$\frac{dS}{dt} = T(\nu G - \rho S) \quad (2)$$

79 Within a time-step, when pairs form, the total population size ( $N$ ) is fixed. At equilibrium, the  
80 ratio of groups to singletons,  $\frac{G}{S} = \frac{\rho}{\nu}$ . Converting to a frequency, the equilibrium number of groups  
81 is

$$G = \left( \frac{\frac{\rho}{\nu}}{1 + \frac{\rho}{\nu}} \right) \left( \frac{N_t}{T} \right) \quad (3)$$

82

83 *Behavioral Resistance:* We compare two types of behavioral resistance: specific avoidance of  
84 diseased individuals and general avoidance of all associations. For specific avoidance, a healthy  
85 individual can detect and avoid pairing only with infected individuals by a factor  $\phi$ . For general  
86 avoidance, a healthy individual encounters all others at a reduced rate ( $\rho - a$ ).

87

88 *Resistance Costs:* Physiological resistance is usually assumed to carry some cost that results in  
89 reduced fitness in the absence of the parasite [5,28]. We assume behavioral resistance can have  
90 two types of cost. Costs of avoidance may be fixed, in that they are incurred regardless of  
91 whether avoidance is carried out; for example, a less active genotype could have fewer social  
92 encounters, but also reduced feeding. The cost reduces births by  $c$  relative to the birthrate of non-  
93 avoiding individuals,  $b$ . Alternatively, sociality could be beneficial, such that costs of avoidance  
94 may only be instantiated when the individual avoids being in a group. We examine the case in  
95 which reproduction increases as a direct, linear function of the frequency at which each type  
96 pairs (see Supplementary Information S1: SE19-SE20).

97

#### 98 *Model Implementation*

99 *Dynamics with No Evolution:* We first examine how the equilibrium frequency of individuals in  
100 pairs and disease dynamics vary across a range of general and specific avoidance parameters ( $\phi$   
101 and  $a$ ) when all individuals avoid disease. We derive how  $R_0$  depends on the equilibrium  
102 frequency of pairs.

103

104 *Evolution of Behavioral Resistance:* To understand the evolution of behavioral resistance we use  
105 the one-locus, two allele dynamical framework developed for physiological resistance evolution  
106 [5]. In this system,  $X_1$  and  $X_2$  represent two haploid genotypes that differ in their resistance, with  
107  $X_2$  avoiding disease.  $X_1$  and  $X_2$  are equivalent in their transmission once infected and are pooled  
108 into one class of diseased individuals,  $Y$ . We assume that once an individual is diseased, it no  
109 longer avoids others. If we assume instead that individuals retain their avoidance once infected, it  
110 can be shown that the results are identical for frequency-dependent pair formation, whereas for

111 general avoidance under density-dependent pair formation,  $Y_1$  and  $Y_2$  need to be distinguished;  
112 however, the results are qualitatively equivalent (Supplementary Information S1 and S2).

113 Transmission occurs at rate  $\delta$  from infected ( $Y$ ) individuals to  $X_1$  or  $X_2$  when they are in a  
114 pair. We assume the disease is sterilizing, i.e. diseased individuals do not reproduce. We impose  
115 density dependence on birth rate of the healthy individuals because without a numerical (i.e.  
116 ecological) feedback, the system does not reach stable equilibrium [28]. We represent  
117 background mortality as  $\mu$ . These processes are represented by

118

$$\frac{dX_1}{dt} = X_1(b - kN_t - \mu) - \delta \left( \frac{2GX_1Y}{N^2} \right) \quad (4)$$

$$\frac{dX_2}{dt} = X_2((b - c) - kN_t - \mu) - \delta \left( \frac{2GX_2Y}{N^2} \right) \quad (5)$$

$$\frac{dY}{dt} = \delta \left( \frac{2GY}{N^2} \right) (X_1 + X_2) - \mu Y \quad (6)$$

119 The process of pair formation is nested within each time-step, such that  $N$  does not  
120 change during pair formation ( $N = S + 2G$ ), but changes each time-step due to changes in  
121 numbers of  $X_1$ ,  $X_2$ , and  $Y$  individuals.

122 We obtained equilibria using the differential equation solver (function “ode” Runge-  
123 Kutta “rk4” method) from the R package *deSolve* [32,33], and confirmed the stability of the  
124 equilibria by perturbation of initial values above and below equilibria.

125

126 **Results**

127 *Dynamics with No Evolution*

128 It can be shown that if all individuals are in pairs, i.e. in contact, then the dynamics of disease  
 129 with pair formation are identical to the physiological resistance model (Supplementary  
 130 Information S1). We first examined the effect of the different avoidance strategies on the  
 131 equilibrium frequency of individuals in pairs, prevalence of disease, and  $R_0$  when only  $X_2$ , the  
 132 avoiding genotype, was present (Fig. 1).

133

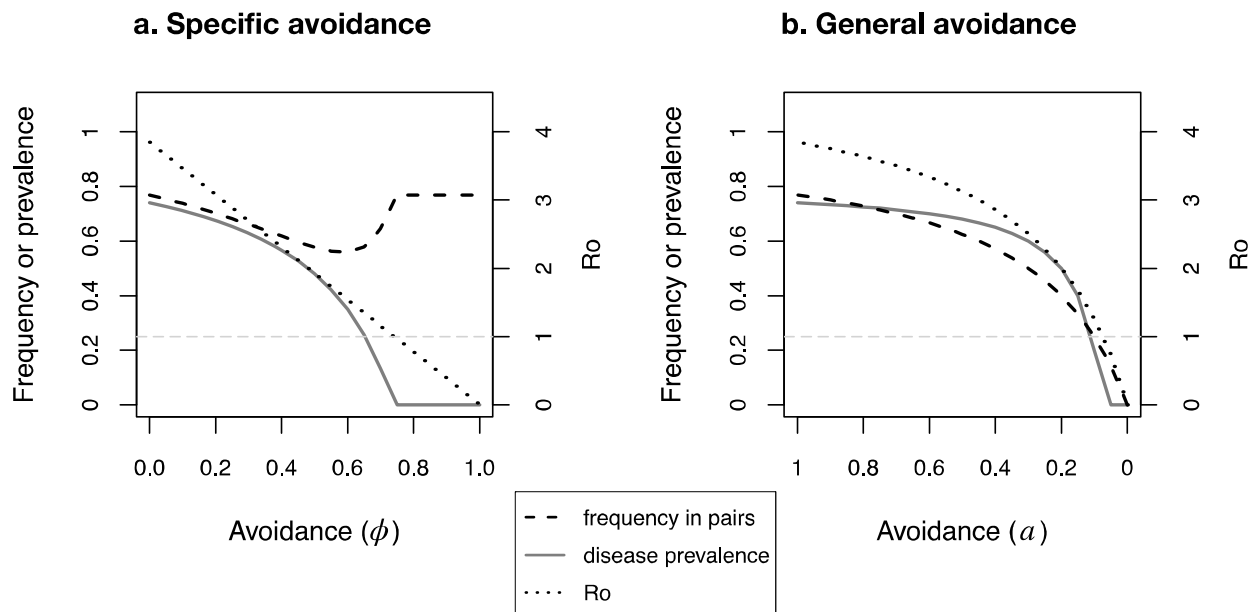

134

135 **Figure 1.** Pairing and disease dynamics at equilibrium when only the avoiding genotype  $X_2$  is present in the  
 136 population under different avoidance strategies. The light gray horizontal dotted line represents the basic  
 137 reproductive number  $R_0 = 1$ , below which the disease cannot persist in the population, and above which  
 138 sustained transmission is possible.  $b = 1, \mu = 0.2, \delta = 1, \rho = 1, v = 0.3, k = 0.01$ .

139

140 The basic reproductive number of the parasite,  $R_0 = \frac{2\delta G}{N\mu}$ , is equivalent to canonical

141 formulations for  $R_0$  for frequency dependent transmission, taking into account the frequency of

142 groups within which transmission occurs. Increased specific avoidance of infected individuals is

143 highly effective at reducing prevalence of the disease, and also results in a decrease in the  
144 frequency of individuals in pairs (Fig. 1a). However, at high levels of specific avoidance the  
145 frequency of individuals in pairs increases again, because few infected  $Y$  individuals remain for  
146 the  $X_2$  individuals to avoid. With further avoidance,  $R_0$  falls below 1, prevalence drops to 0, and  
147 pair formation is only among healthy individuals. Thus, at high levels of specific avoidance,  
148 hosts can successfully extirpate the disease from the population while maintaining their social  
149 structure.

150         General avoidance also reduces  $R_0$  and prevalence, but if per-contact transmission rate  
151 ( $\delta$ ) is high, avoidance of pairing must be nearly complete to reduce  $R_0$  below the threshold of 1  
152 (Fig. 1b). Therefore, if hosts cannot detect infection in conspecifics but avoid pairing generally,  
153 behavioral avoidance effectively reduces disease risk, but at levels that concomitantly  
154 compromise host social structure.

155

### 156 *Evolution of Behavioral Resistance*

157 We next examined the evolutionary dynamics in a population with genetic variants that do ( $X_2$ )  
158 and do not ( $X_1$ ) avoid disease. When behavioral resistance was through specific avoidance of  
159 infected individuals and costs were fixed,  $X_1$  and  $X_2$  could stably coexist when levels of  
160 avoidance by  $X_2$  were high, and over an increasing range of costs, including very high costs to  
161 the avoider (>50% reduction in birth rate) at high levels of avoidance (Fig. 2a). When behavioral  
162 resistance was through general avoidance, the same overall pattern emerged, but the spread of  
163 resistance required much higher levels of avoidance, and the coexistence of  $X_1$  and  $X_2$  was only  
164 possible under extreme levels of avoidance, although still over a wide range of costs (Fig. 2b).



165

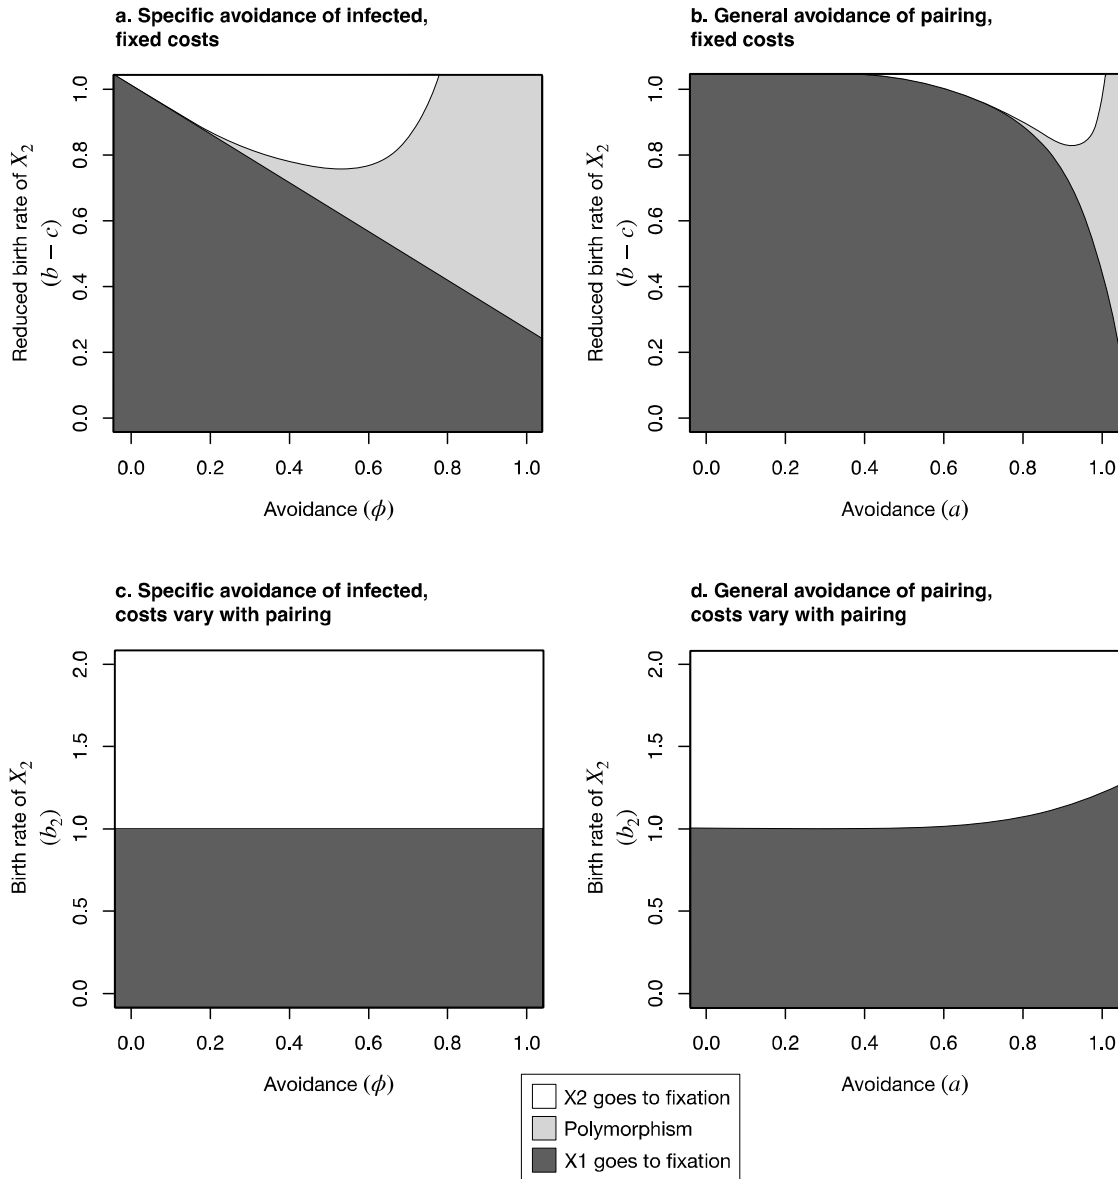

166 **Figure 2:** Shaded areas represent equilibrium gene frequency states for the models when the cost  
 167 and the avoidance strategy of  $X_2$  are varied.  $b = 1, \mu = 0.2, \delta = 1, \rho = 1, v = 0.3, k = 0.01$ .  
 168

169 When costs were incurred as a consequence of not being in a group, in the case of  
 170 specific avoidance, the benefits of reduced disease risk balanced the costs of lost social  
 171 interactions, such that  $X_2$  went to fixation when its birth rate was higher than  $X_1$  (Fig. 2c). When

172 avoidance was general,  $X_1$  could even sometimes reach fixation when  $X_2$  had a higher birth rate,  
173 because at high rates of general avoidance, reductions in disease risk were not substantial enough  
174 to compensate for the loss of social contacts (Fig. 2d). In both cases, when costs were linearly  
175 dependent on the frequency of individuals in pairs, polymorphism between  $X_1$  and  $X_2$  was not  
176 possible.

177

## 178 **Discussion**

179 Our results show that the dynamics of behavioral resistance can differ from physiological or  
180 biochemical resistance evolution depending on the nature of the social behavior and whether the  
181 costs are fixed or depend on sociality. As expected, avoidance of social interactions with  
182 diseased individuals resulted in reductions of disease prevalence, and this was more effective  
183 when there was specific avoidance of diseased individuals, as opposed to general avoidance of  
184 social interactions. High levels of specific avoidance result in the full preservation of social  
185 structure when hosts extirpate the disease through behavioral mechanisms, whereas at levels of  
186 general avoidance that prevent disease spread, social structure is harder to maintain. When there  
187 is genetic variation in avoidance levels, the spread of genotypes that avoid group formation  
188 depends on the type, level, and nature of the costs of avoidance. When avoidance is specific and  
189 costs are fixed, the outcomes are identical to those for physiological resistance evolution,  
190 including the counterintuitive outcome that stable genetic polymorphism is more likely when  
191 resistance is extreme and costs are large rather than small [5,28]. However, when the costs  
192 represent the loss of benefits of group living itself, genetic variation in resistance is much harder  
193 to maintain. The possibility of stable genetic variation in behavioral resistance suggests not only  
194 that mixed avoidance strategies may represent stable states, but also that genetic differences may

195 be at least partially responsible for individual differences in parasite avoidance in many species,  
196 including humans [34,35].

197         The differences we observe between specific and general avoidance highlight the  
198 importance of public health interventions like testing, isolating positive cases, and contact tracing  
199 for controlling an outbreak of an emergent disease for which asymptomatic transmission is  
200 possible, as in COVID-19 [36]. The maintenance of a polymorphic state under some conditions  
201 suggests that if avoidance behavior could be performed flexibly in our simple example, a mixed  
202 strategy of social distancing that allows for some social interaction might strike a balance  
203 between the costs and benefits. If infection is undetectable, a heavier emphasis on isolation and  
204 avoidance would be required for such a mixed strategy to work.

205         To dissect the basic differences between behavioral and physiological resistance we have  
206 deliberately kept the models simple. Future application to any specific host-pathogen context  
207 would require more complexity in the temporal and social structure of the interactions. For  
208 example, in larger groups, transmission within groups and movement between groups would be  
209 possible, and behavioral resistance strategies could be more diverse. Additional models could  
210 also examine the effect of mortality, rather than reproduction, costs. Consistent with previous  
211 research, this simple model highlights trade-offs between the benefits of reducing disease risk  
212 and the costs of foregoing other opportunities, whether nutritional [26], reproductive [27], or in  
213 the case of our model, social.

214         Behavioral and physiological resistance are not separate phenomena but likely interact,  
215 with behavioral effects being antecedent to physiological resistance, similar to a two-step  
216 infection process [37]. In such situations, genetic associations can arise between genes  
217 determining resistance, even without any direct physiological interaction. Physiological and

218 behavioral defenses against parasites might also trade-off with one another. For example, house  
219 finches that avoid sick conspecifics invest less in immune defenses [22].

220 A genetic basis for parasite avoidance behaviors has support from knockout experiments  
221 in laboratory mice [38] and selective breeding in livestock [39]. There is also direct evidence of  
222 genetic polymorphism in social behavior in halictid bees [40]. Behavioral resistance can thus be  
223 innate, as we model it, or learned through prior exposure [41–43]. How dynamics of learned  
224 resistance differ from innate is a rich direction for future research. Together these responses  
225 represent a suite of psychological and cognitive mechanisms that psychologists have termed the  
226 “behavioral immune system” [44], and our study shows that how this metaphor translates to  
227 dynamics of behavioral resistance merits further examination.

228

### 229 **Funding**

230 This work was funded by NIH R01GM122061, part of the joint NSF-NIH-USDA Ecology and  
231 Evolution of Infectious Diseases program.

232

### 233 **Code and Supporting Materials**

234 All code and derivations can be found in the Supplementary Materials.

235

### 236 **Competing Interests**

237 The authors have no competing interests to declare.

238

### 239 **Authors' Contributions**

240 CRA and JA conceived the project and derived the equations together. CRA carried out the  
241 simulations and drafted the manuscript. JA provided critical input on the simulations and  
242 revisions to the manuscript. All authors gave final approval for publication and agree to be held  
243 accountable for the work performed therein.

244

## 245 **References**

246

- 247 1. Boots M, Bowers RG. 1999 Three mechanisms of host resistance to microparasites -  
248 Avoidance, recovery and tolerance - Show different evolutionary dynamics. *J. Theor.*  
249 *Biol.* **201**, 13–23. (doi:10.1006/jtbi.1999.1009)
- 250 2. Hayward AD, Garnier R, Watt KA, Pilkington JG, Grenfell BT, Matthews JB, Pemberton  
251 JM, Nussey DH, Graham AL. 2014 Heritable, heterogeneous, and costly resistance of  
252 sheep against nematodes and potential feedbacks to epidemiological dynamics. *Am. Nat.*  
253 **184**. (doi:10.1086/676929)
- 254 3. Parker BJ, Barribeau SM, Laughton AM, Roode JC De, Gerardo NM. 2011 Non-  
255 immunological defense in an evolutionary framework. *Trends Ecol. Evol.* **26**, 242–248.  
256 (doi:10.1016/j.tree.2011.02.005)
- 257 4. Best A, White A, Boots M. 2009 The implications of coevolutionary dynamics to host-  
258 parasite interactions. *Am. Nat.* **173**, 779–791. (doi:10.1086/598494)
- 259 5. Antonovics J, Thrall PH. 1994 The cost of resistance and the maintenance of genetic  
260 polymorphism in host-pathogen systems. *Proc. R. Soc. B Biol. Sci.* **257**, 105–110.  
261 (doi:10.1098/rspb.1994.0101)
- 262 6. Antonovics J, Boots M, Ebert D, Koskella B, Poss M, Sadd BM. 2013 The origin of  
263 specificity by means of natural selection: Evolved and nonhost resistance in host-pathogen  
264 interactions. *Evolution.* **67**, 1–9. (doi:10.1111/j.1558-5646.2012.01793.x)
- 265 7. Boots M, Bowers RG. 2004 The evolution of resistance through costly acquired  
266 immunity. *Proc. R. Soc. B Biol. Sci.* **271**, 715–723. (doi:10.1098/rspb.2003.2655)
- 267 8. Hart BL. 2011 Behavioural defences in animals against pathogens and parasites: parallels  
268 with the pillars of medicine in humans. *Philos. Trans. R. Soc. B Biol. Sci.* **366**, 3406–3417.  
269 (doi:10.1098/rstb.2011.0092)
- 270 9. de Roode JC, Lefèvre T. 2012 Behavioral Immunity in Insects. *Insects* **3**, 789–820.  
271 (doi:10.3390/insects3030789)
- 272 10. Curtis V, de Barra M, Aunger R. 2011 Disgust as an adaptive system for disease  
273 avoidance behaviour. *Philos. Trans. R. Soc. Lond. B. Biol. Sci.* **366**, 389–401.  
274 (doi:10.1098/rstb.2010.0117)
- 275 11. Tybur JM, Lieberman D. 2016 Human pathogen avoidance adaptations. *Curr. Opin.*  
276 *Psychol.* **7**, 6–11. (doi:10.1016/j.copsyc.2015.06.005)
- 277 12. Alexander RD. 1974 The evolution of social behavior. *Annu. Rev. Ecol. Syst.* **5**, 325–383.  
278 (doi:10.1146/annurev.es.05.110174.001545)
- 279 13. Loehle C. 1995 Social barriers to pathogen transmission in wild animal populations.  
280 *Ecology* **76**, 326–335. (doi:10.2307/1941192)
- 281 14. Freeland WJ. 1979 Primate social groups as biological islands. *Ecology* **60**, 719–728.

- 282 (doi:10.2307/1936609)
- 283 15. Anderson RM, May RM. 1979 Population biology of infectious diseases: Part I. *Nature*
- 284 **280**, 361–367. (doi:10.1038/280361a0)
- 285 16. May RM, Anderson RM. 1979 Population biology of infectious diseases: Part II. *Nature*
- 286 **280**, 455–461. (doi:10.1038/280455a0)
- 287 17. Antonovics J, Iwasa Y, Hassell MP. 1995 A generalized model of parasitoid, venereal,
- 288 and vector-based transmission processes. *Am. Nat.* **145**, 661–675. (doi:10.1086/285761)
- 289 18. McCallum H *et al.* 2017 Breaking beta: Deconstructing the parasite transmission function.
- 290 *Philos. Trans. R. Soc. B Biol. Sci.* **372**. (doi:10.1098/rstb.2016.0084)
- 291 19. Boots M, Haraguchi Y. 1999 The evolution of costly resistance in host-parasite systems.
- 292 *Am. Nat.* **153**, 359–370. (doi:10.1086/303181)
- 293 20. Behringer DC, Butler MJ, Shields JD. 2006 Avoidance of disease by social lobsters.
- 294 *Nature* **441**, 421. (doi: 10.1038/441421a)
- 295 21. Bouwman KM, Hawley DM. 2010 Sickness behaviour acting as an evolutionary trap?
- 296 Male house finches preferentially feed near diseased conspecifics. *Biol. Lett.* **6**, 462–465.
- 297 (doi:10.1098/rsbl.2010.0020)
- 298 22. Zylberberg M, Klasing KC, Hahn TP. 2013 House finches (*Carpodacus mexicanus*)
- 299 balance investment in behavioural and immunological defences against pathogens. *Biol.*
- 300 *Lett.* **9**. (doi:10.1098/rsbl.2012.0856)
- 301 23. Poirotte C, Massol F, Herbert A, Willaume E, Bomo PM, Kappeler PM, Charpentier MJE.
- 302 2017 Mandrills use olfaction to socially avoid parasitized conspecifics. *Sci. Adv.* **3**,
- 303 e1601721. (doi:10.1126/sciadv.1601721)
- 304 24. Curtis V a. 2014 Infection-avoidance behaviour in humans and other animals. *Trends*
- 305 *Immunol.* **35**, 457–64. (doi:10.1016/j.it.2014.08.006)
- 306 25. Buck JC, Weinstein SB, Young HS. 2018 Ecological and evolutionary consequences of
- 307 parasite avoidance. *Trends Ecol. Evol.* **0**, 1–14. (doi:10.1016/j.tree.2018.05.001)
- 308 26. Fox NJ, Marion G, Davidson RS, White PCL, Hutchings MR. 2013 Modelling parasite
- 309 transmission in a grazing system: The importance of host behaviour and immunity. *PLoS*
- 310 *One* **8**. (doi:10.1371/journal.pone.0077996)
- 311 27. Theuer M, Berc L. 2018 Impacts of infection avoidance for populations affected by
- 312 sexually transmitted infections. *J. Theor. Biol.* **455**, 64–74.
- 313 (doi:10.1016/j.jtbi.2018.06.030)
- 314 28. Boots M, Best A, Miller MR, White A. 2009 The role of ecological feedbacks in the
- 315 evolution of host defence: What does theory tell us? *Philos. Trans. R. Soc. B Biol. Sci.*
- 316 **364**, 27–36. (doi:10.1098/rstb.2008.0160)
- 317 29. Haderl KP. 1989 Pair formation in age-structured populations. *Acta Appl. Math.* **14**, 91–
- 318 102. (doi:10.1007/BF00046676)
- 319 30. Gimelfarb A. 1988 Processes of pair formation leading to assortative mating in biological
- 320 populations: encounter-mating model. *Am. Nat.* **131**, 865–884. (doi:10.1086/284827)
- 321 31. Antonovics J, Bergmann J, Hempel S, Verbruggen E, Veresoglou S, Rillig M. 2015 The
- 322 evolution of mutualism from reciprocal parasitism: more ecological clothes for the
- 323 Prisoner’s Dilemma. *Evol. Ecol.* **29**, 627–641. (doi:10.1007/s10682-015-9775-6)
- 324 32. Soetaert K, Petzoldt T, Setzer RW. 2010 Solving differential equations in R: Package
- 325 deSolve. *J. Stat. Softw.* **33**, 1–25. (doi:10.18637/jss.v033.i09)
- 326 33. R Core Team 2017. R: A language and environment for statistical computing. R
- 327 Foundation for Statistical Computing, Vienna, Austria.(url:<https://www.R-project.org/>)

- 328 34. Fessler DMT, Pillsworth EG, Flamson TJ. 2004 Angry men and disgusted women: An  
329 evolutionary approach to the influence of emotions on risk taking. **95**, 107–123.  
330 (doi:10.1016/j.obhdp.2004.06.006)
- 331 35. Sarabian C, MacIntosh AJJ. 2015 Hygienic tendencies correlate with low geohelminth  
332 infection in free-ranging macaques. *Biol. Lett.* **11**, 20150757.  
333 (doi:10.1098/rsbl.2015.0757)
- 334 36. Bai Y, Yao L, Wei T, Tian F, Jin D-Y, Chen L, Wang M. 2020 Presumed asymptomatic  
335 carrier transmission of COVID-19. *N. Engl. J. Med.* **323**, 1406–1407.  
336 (doi:10.1056/NEJMoa2001316)
- 337 37. Fenton A, Antonovics J, Brockhurst MA. 2012 Two-step infection processes can lead to  
338 coevolution between functionally independent infection and resistance pathways.  
339 *Evolution.* **66**, 2030–2041. (doi:10.1111/j.1558-5646.2012.01578.x)
- 340 38. Kavaliers M, Choleris E, Ågmo A, Muglia LJ, Ogawa S, Pfaff DW. 2005 Involvement of  
341 the oxytocin gene in the recognition and avoidance of parasitized males by female mice.  
342 *Anim. Behav.* **70**, 693–702. (doi:10.1016/j.anbehav.2004.12.016)
- 343 39. Hutchings MR, Knowler KJ, McAnulty R, McEwan JC. 2007 Genetically resistant sheep  
344 avoid parasites to a greater extent than do susceptible sheep. *Proc. R. Soc. B Biol. Sci.*  
345 **274**, 1839–1844. (doi:10.1098/rspb.2007.0398)
- 346 40. Kocher SD, Mallarino R, Rubin BER, Yu DW, Hoekstra HE, Pierce NE. 2018 The genetic  
347 basis of a social polymorphism in halictid bees. *Nat. Commun.* **9**. (doi:10.1038/s41467-  
348 018-06824-8)
- 349 41. Klemme I, Karvonen A. 2016 Learned parasite avoidance is driven by host personality  
350 and resistance to infection in a fish-trematode interaction. *Proc. R. Soc. B Biol. Sci.* **283**.  
351 (doi:10.1098/rspb.2016.1148)
- 352 42. James CT, Noyes KJ, Stumbo AD, Wisenden BD, Goater CP. 2008 Cost of exposure to  
353 trematode cercariae and learned recognition and avoidance of parasitism risk by fathead  
354 minnows *Pimephales promelas*. *J. Fish Biol.* **73**, 2238–2248. (doi:10.1111/j.1095-  
355 8649.2008.02052.x)
- 356 43. Klemme I, Karvonen A. 2018 Experience and dominance in fish pairs jointly shape  
357 parasite avoidance behaviour. *Anim. Behav.* **146**, 165–172.  
358 (doi:10.1016/j.anbehav.2018.10.022)
- 359 44. Schaller M, Park JH. 2011 The behavioral immune system (and why it matters). *Curr.*  
360 *Dir. Psychol. Sci.* **20**, 99–103. (doi:10.1177/0963721411402596)
- 361  
362  
363  
364
